# Supplementary material for: An irregular-octagonal-prism-shaped host–guest supramolecular network based on silicotungstate and manganese-complex for light-driven hydrogen evolution
Source: Royal Society of Chemistry journal article supplement (doi:10.1039/d0nj05245k), 2021-01-01
Supplement: d0nj05245k1.pdf [file d0nj05245k1.pdf]

---

**An Irregular-Octagonal-Prism-shaped Host-Guest Supramolecular Network based on Silicotungstate and Manganese-Complexes for Light-Driven Hydrogen Evolution**

Ruoru Yang<sup>a§</sup>, Bonan Li<sup>a§</sup>, Xiaoyong Lai<sup>b</sup>, Xiaojing Yu<sup>a</sup>, Boxin Xiao<sup>a</sup>, Sumin Hu<sup>a</sup>,  
Haijun Pang<sup>a\*</sup>, Huiyuan Ma<sup>a\*</sup>, Xinming Wang<sup>a</sup> and Lichao Tan<sup>a</sup>

<sup>a</sup>College of Chemical and Environmental Engineering, Harbin University of Science and Technology, Harbin, 150040, P. R. China

<sup>b</sup>State Key Laboratory of High-efficiency Utilization of Coal and Green Chemical Engineering

\*E-mail: [panghj116@163.com](mailto:panghj116@163.com), Tel./fax.: 86-0451-86688575.

\*E-mail: [mahy017@163.com](mailto:mahy017@163.com), Tel./fax: 86-0451-86392716.

---

## Table of contents

### Section 1 Experimental Section

*I: Materials and General Method*.....page S3

*II: X-ray Crystallographic Study*.....page S3

*III: Table S1 (Crystal data and structure refinement for compound 1)*.....page S4

*IV: Experimental process on photocatalytic hydrogen evolution*.....page S5

### Section 2 Supplementary structural figures and characterization information

*I: Fig. S1-S9*.....page S6-S8

*II: Table S2 and S3*.....page S8

---

## Section 1 Experimental Section

### *I: Materials and General Methods*

All reagents were purchased commercially and were used without further purification. The FT-IR spectrum was recorded from KBr pellets in the range of 4000–400  $\text{cm}^{-1}$  with a Bruker OPTIK GmbH-Tensor II spectrometer. The powder X-ray diffraction (PXRD) data was collected on a Bruker OPTIK GmbH-Tensor II spectrometer at room temperature. Optical properties were also studied by diffuse reflectance UV-vis spectroscopy (Lambda 35 spectrometer), Photoluminescence spectrum (PL) (SPEX Fluorolog-3 spectrofluorometer). The X-ray photoelectron spectroscopy (XPS) measurements were implemented by a Thermo ESCALAB 250Xi spectrometer with monochromatic Al  $K\alpha$  radiation ( $h\nu = 1486.6 \text{ eV}$ ). All XPS spectra were characterized with respect to the C 1s peak at 284.8 eV.

The electrochemical impedance spectra (EIS), Mott-schottky plot and photocurrent-time (I-T) profiles was recorded on the CHI660E electrochemical workstation with a standard three-electrode system with the photocatalyst-coated ITO as the working electrode, Pt plate as the counter electrode, and Ag/AgCl electrode as a reference electrode. A 500 W Xenon lamp was used as the light source during the measurement. A 0.25 M  $\text{Na}_2\text{SO}_4$  solution was used as the electrolyte.

### *II: X-ray Crystallographic Study*

Single crystal X-ray diffraction data collections of compound **1** was performed using a Bruker Smart Apex CCD diffractometer with Mo-K $\alpha$  radiation ( $\lambda = 0.71073 \text{ \AA}$ ) at 293 K. Multi-scan absorption corrections were applied. The structure was solved by

Direct Methods and refined by full-matrix least-squares on  $F_2$  using the SHELXTL 2014 crystallographic software package. Anisotropic displacement parameters were used to refine all non-hydrogen atoms. The organic hydrogen atoms were generated geometrically. All H atoms on C atoms were fixed at the calculated positions.

**III: Table S1 (Crystal data and structure refinement for compound 1)**

**Table S1** Crystal data and structure refinements for title compounds.

| Compound                            | <b>1</b>                                                                                          |
|-------------------------------------|---------------------------------------------------------------------------------------------------|
| Formula                             | C <sub>36</sub> H <sub>38</sub> Mn <sub>2</sub> N <sub>30</sub> O <sub>44</sub> SiW <sub>12</sub> |
| Formula weight                      | 3938.95                                                                                           |
| Crystal system                      | Monoclinic                                                                                        |
| Space group                         | C2/c                                                                                              |
| $a/\text{Å}$                        | 22.256(5)                                                                                         |
| $b/\text{Å}$                        | 20.132(5)                                                                                         |
| $c/\text{Å}$                        | 17.579(5)                                                                                         |
| $\alpha/^\circ$                     | 90                                                                                                |
| $\beta/^\circ$                      | 107.03(5)                                                                                         |
| $\gamma/^\circ$                     | 90                                                                                                |
| $V/\text{Å}^3$                      | 7531(3)                                                                                           |
| $Z$                                 | 4                                                                                                 |
| $D_{\text{calcd}}/\text{g cm}^{-3}$ | 3.474                                                                                             |
| T/K                                 | 293(2)                                                                                            |
| $\mu/\text{mm}^{-1}$                | 18.696                                                                                            |
| Refl. Measured                      | 25384                                                                                             |
| Refl. Unique                        | 8391                                                                                              |
| $R_{\text{int}}$                    | 0.0714                                                                                            |
| $F(000)$                            | 7072                                                                                              |
| GoF on $F^2$                        | 1.100                                                                                             |
| $R_1/wR_2 [I \geq 2\sigma(I)]$      | 0.0553/0.1074                                                                                     |

$$R_1 = \frac{\sum \|F_o\| - |F_c|}{\sum \|F_o\|} \cdot wR_2 = \frac{\sum [w(F_o^2 - F_c^2)^2]}{\sum [w(F_o^2)^2]}^{1/2}$$

---

#### ***IV: Experimental process on photocatalytic hydrogen evolution***

All photocatalytic experiments were conducted in a 27 mL Pyrex reaction vessel via a photocatalytic H<sub>2</sub> evolution activity evaluation system, where the photoreaction temperature was kept at a constant temperature (4 °C) with circulating water through a thermostat. The gas circulation was swept by high purity N<sub>2</sub> before illumination. For each experiment, the 5 mg photocatalyst was dispersed in 20 mL of 10 vol % triethylamine (TEA) and 50 vol% acetone aqueous solution under a 500 W Xe lamp (without cut-off filter). Place the reactor on a stirrer and continue to stir and irradiate for 3h, enabling the photocatalyst to maintain a uniform dispersion state and uniform illumination during the experimental process. The amount of hydrogen evolved was determined at an interval of 1 h with gas chromatography.

---

## Section 2 Supplementary structural figures and characterization

### information

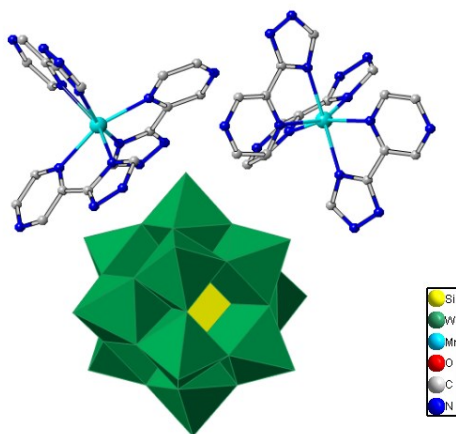

**Fig. S1** View of the basic crystallographic unit in compound **1** (All H atoms and lattice water molecules are omitted for clarity).

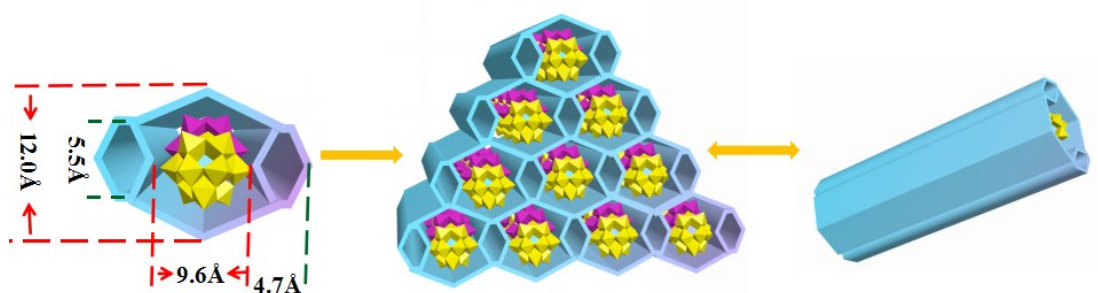

**Fig. S2** Detailed view of an irregular-octagonal-prism-shaped of host-guest supramolecular network

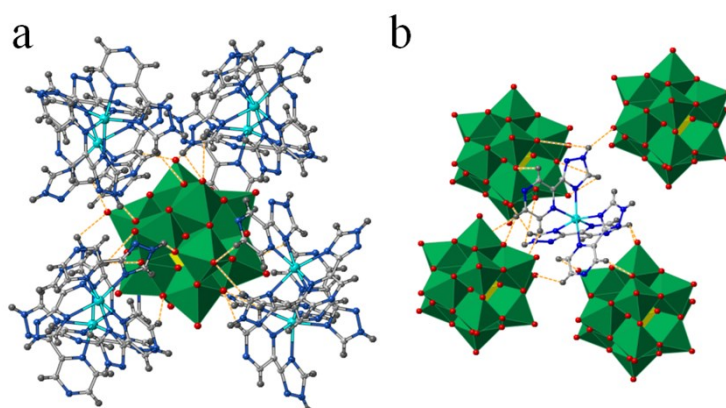

**Fig. S3** Ball and stick views of the coordination environments of (a)  $\text{SiW}_{12}$  cluster; (b)  $\{\text{Mn}(\text{L})_3\}$  fragment in compound **1**.

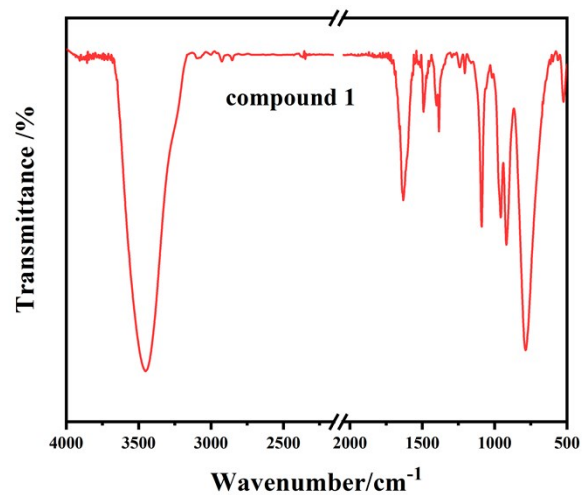

Fig. S4 The IR spectra of compound 1 and  $\text{SiW}_{12}$

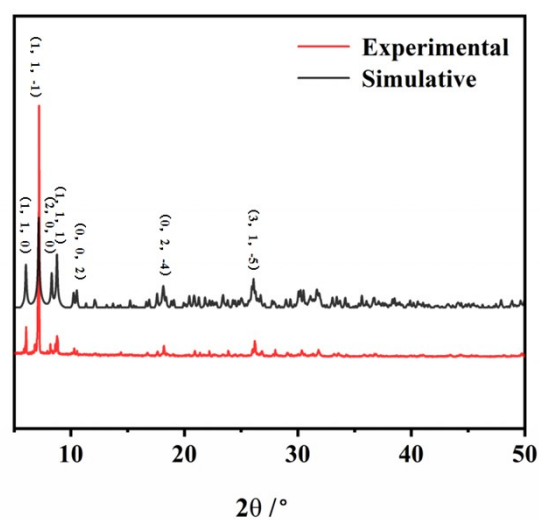

Fig. S5 Stimulative (black) and experimental (red) PXRD patterns of compound 1

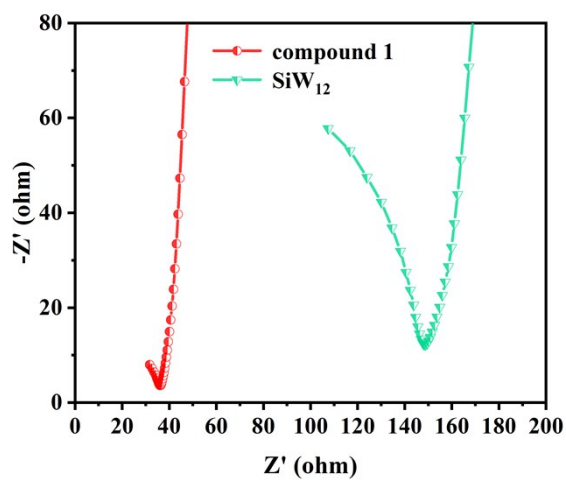

Fig. S6. EIS Nyquist plots of compound 1 and  $\text{SiW}_{12}$

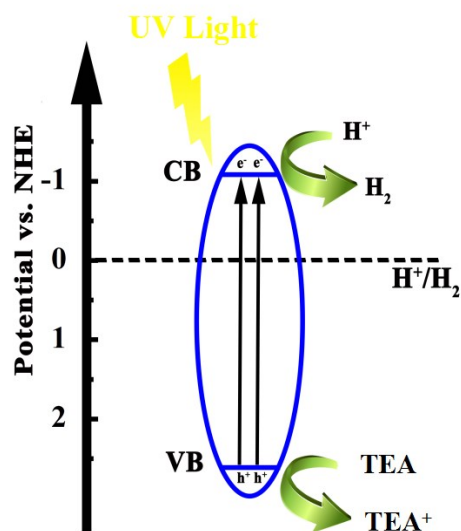

**Fig. S7.** The proposed mechanism of the photocatalytic reaction.

**Table S2.** IR peak assignments of the compound **1**

| Location of absorption peaks | Characteristic absorption peaks |
|------------------------------|---------------------------------|
| 1090                         | Si-O <sub>c</sub>               |
| 957                          | W=O <sub>t</sub>                |
| 916                          | W-O <sub>b</sub> -W             |
| 782                          | W-O <sub>c</sub> -W             |
| 1384                         | C-N stretch                     |
| 1489                         | C-N stretch                     |
| 1629                         | C=N stretch                     |

**Table. S3** Bond-valence Sums for the Mn and W Atoms of compound **1**

| Atom  | BVS    | Oxidation State |
|-------|--------|-----------------|
| Mn(1) | 1.8481 | +II             |
| W(1)  | 6.4412 | +VI             |
| W(2)  | 6.4674 | +VI             |
| W(3)  | 6.4969 | +VI             |
| W(4)  | 6.4944 | +VI             |
| W(5)  | 6.4903 | +VI             |
| W(6)  | 6.4982 | +VI             |
| W(7)  | 6.2490 | +VI             |
